# Supplementary material
Source: Springer Nature journal article supplement (https://www.springermedizin.de/resource/supplementary/12936_2011_1749_MOESM1_ESM.pdf/9541674)

## Study Area

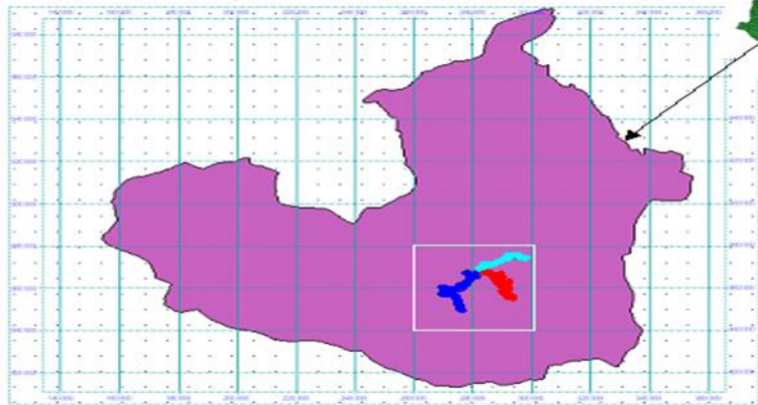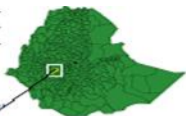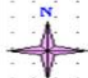

■ Kitto ■ Koffe ■ Kitto  
■ Jimma

Supplement: MOESM1 [file 9541674]
